# Supplementary material
Source: PubMed Central journal article supplement (PMC6646007)
Supplement: ao8b00746_si_001.pdf [file ao8b00746_si_001.pdf]

**Supporting Information for:**

# Enzymatic synthesis of glycerol carbonate using lipase immobilized on magnetic organosilica nanoflower as catalyst

*Yingjie Du<sup>a</sup>, Jing Gao<sup>a,b\*</sup>, Weixi Kong<sup>a</sup>, Liya Zhou<sup>a</sup>, Li Ma<sup>a</sup>, Ying He<sup>a</sup>, Zhihong*

*Huang<sup>a</sup>, Yanjun Jiang<sup>a,b\*</sup>*

<sup>a</sup> School of Chemical Engineering and Technology and <sup>b</sup> National-Local Joint  
Engineering Laboratory for Energy Conservation of Chemical Process Integration and  
Resources Utilization, Hebei University of Technology, No. 8 Guangrong Road,  
Hongqiao District, Tianjin 300130, China

\* Corresponding Author:

Address: No. 8 Guangrong Road, Hongqiao District, Tianjin 300130, P.R. China

E-mail: yanjunjiang@hebut.edu.cn. Phone: 86-22-60204945. Fax:

86-22-60204294(Y.J.). E-mail: jgao@hebut.edu.cn. Phone: 86-22-60202416 (J.G.).

### Computational formulas for quantitative analysis of GC and GL:

The standard curve of GL/cyclohexanol mass ratio to the peak area ratio:

$$M_{GL} = (A_{GL}/A_C - b_1) \times M_C/k_1$$

The standard curve of GC/cyclohexanol mass ratio to the peak area ratio:

$$M_{GC} = (A_{GC}/A_C - b_2) \times M_C/k_2$$

Computational formula of GL conversation rate:

$$C = (1 - M_{GLr}/M_{GLi}) \times 100\%$$

Computational formula of GC yield:

$$Y = (M_{GCe}/M_{GCt}) \times 100\%$$

Computational formula of selectivity:

$$S = Y/C$$

Note: C: GL conversation rate; Y: GC yield; S: selectivity;  $A_{GL}$ : peak area of GL;

$A_{GC}$ : peak area of GC;  $A_C$ : peak area of cyclohexanol;  $M_{GL}$ : amount of GL;  $M_{GLr}$ :

residual amount of GL;  $M_{GLi}$ : initial amount of GL;  $M_C$ : amount of cyclohexanol;

$M_{GC}$ : amount of GC;  $M_{GCe}$ : experiment value of GC amount;  $M_{GCt}$ : theoretical value

of GC amount.  $b_2=0.1237$  and  $k_2= M_C/0.2958$ ;  $b_1= 0.06383$  and  $k_1= M_C/0.1880$ .

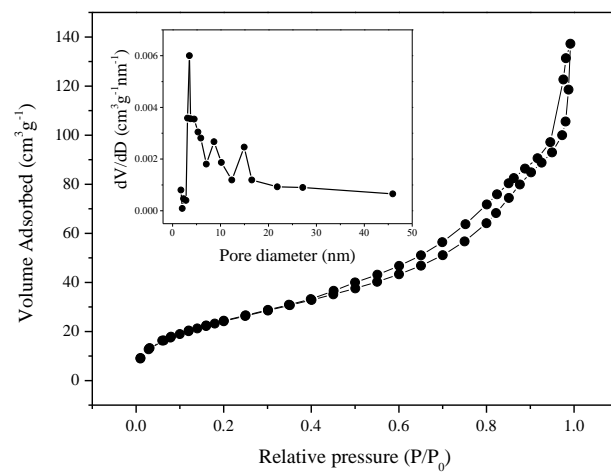

Figure S1 Nitrogen adsorption-desorption isotherms and pore size distribution profile of nanoflowers.

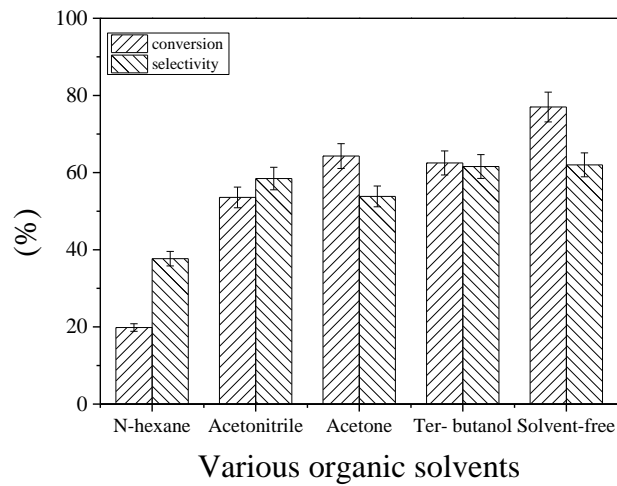

Figure S2. Effect of various organic solvents on the transformation rate of glycerol and the selectivity of immobilized enzyme
